# Supplementary material for: Kisspeptin Is Upregulated at the Maternal-Fetal Interface of the Preeclamptic-like BPH/5 Mouse and Normalized after Synchronization of Sex Steroid Hormones
Source: PubMed Central journal article supplement (PMC10399610; doi:10.3390/reprodmed3040021), 2022-10-14
Supplement: NIHMS1915154-supplement-Supplementary_Material.pdf [file NIHMS1915154-supplement-Supplementary_Material.pdf]

Article Supplement:

# Kisspeptin Is Upregulated at the Maternal-Fetal Interface of the Preeclamptic-Like BPH/5 Mouse and Normalized after Synchronization of Sex Steroid Hormones

Viviane C. L. Gomes <sup>1</sup>, Ashley K. Woods <sup>2</sup>, Kassandra R. Crissman <sup>1</sup>, Camille A. Landry <sup>1</sup>, Kalie F. Beckers <sup>1</sup>, Bryce M. Gilbert <sup>3</sup>, Lucas R. Ferro <sup>1</sup>, Chin-Chi Liu <sup>1</sup>, Erin L. Oberhaus <sup>3</sup> and Jenny L. Sones <sup>1,\*</sup>

**Table S1.** Forward and reverse *Mus musculus*-specific primer sequences used in qRT-PCR

| Gene          | Primer Sequence                                                   | Reference                 |
|---------------|-------------------------------------------------------------------|---------------------------|
| <i>18S</i>    | F: 5'GTAACCCGTTGAACCCATT3'<br>R: 5'CCATCCAATCGGTAGTAGCG3'         | Sones et al., 2016 [1]    |
| <i>Kiss1</i>  | F: 5' CGAAGGAGTTCCAGTTGTAGG3'<br>R: 5'AAGGAATCGCGGTATGCA3'        | Zhang et al., 2014 [2]    |
| <i>Kiss1r</i> | F: 5'CCGTCCAACGCTTCAGGAT3'<br>R: 5'GTGTAGCGAAAAACAGGGGAA3'        | Zhang et al., 2014 [2]    |
| <i>Timp1</i>  | F: 5' GACGGCCTTCTGCAATTCC3'<br>R: 5' GTATAAGGTGGTCTGGTTGACTTCTG3' | Sakamuri et al., 2017 [3] |
| <i>Timp2</i>  | F: 5' GAGCCTGAACCACAGGTACCA3'<br>R: 5' AGGAGATGTAGCACGGGATCA3'    | Sakamuri et al., 2017 [3] |
| <i>Timp4</i>  | F: 5' CACCCTCAGCAGCACATCTG 3'<br>R: 5' GGCCGGAACACTTCTCACT 3'     | Sakamuri et al., 2017 [3] |
| <i>Lif</i>    | F:5'TCAGCGACAAAGTTACTCCACCGT3'<br>R:5'AAGTGATGACAAAGCCCAACAGGC3'  | Sones et al., 2016 [1]    |

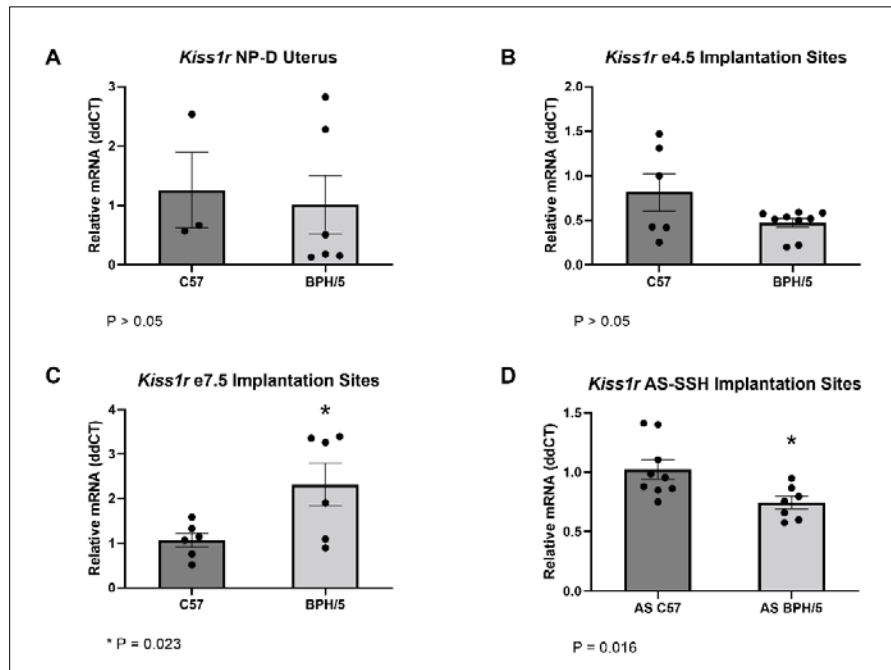

**Supplement Figure S1.** Kisspeptin receptor (*Kiss1r*) gene expression in the BPH/5 non-pregnant diestrus (NP-D) uterus and maternal-fetal interface. Relative mRNA expression of *Kiss1r* in the NP-D uterus (A), and embryonic implantation sites (eIS) of BPH/5 and C57 females carrying natural (NAT) pregnancies at embryonic day (e) 4.5 (B) and e7.5 (C). (D) *Kiss1r* expression during the peak of embryonic implantation in the eIS of BPH/5 and C57 females that underwent early pregnancy artificial synchronization of sex steroid hormones (AS-SSH). Gene expression assessed via qRT-PCR (n = 3-9/group). Student's t-test, \* P < 0.05. Data expressed as mean ± SEM.

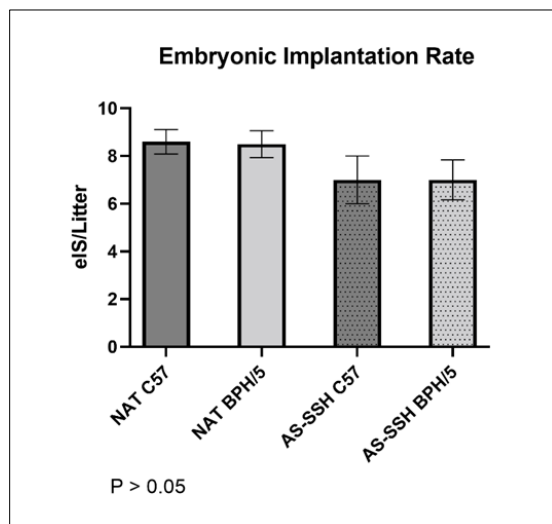

**Supplement Figure S2.** Embryonic implantation rate was not affected by artificial synchronization of sex steroid hormones (AS-SSH). Number of embryonic implantation sites (eIS) per litter in BPH/5 and C57 females carrying natural (NAT) pregnancies at embryonic day (e) 4.5, and BPH/5 and C57 females that underwent AS-SSH, two days post-administration of 17β-estradiol. One-way ANOVA, P > 0.05. Data expressed as mean ± SEM.
